# Supplementary material for: Solution processed intrinsically conductive polymer films with high thermoelectric properties and good air stability
Source: Royal Society of Chemistry journal article supplement (doi:10.1039/c8ta08682f), 2018-01-01
Supplement: c8ta08682f1.pdf [file c8ta08682f1.pdf]

## Electronic Supplementary Information (ESI)

### Solutionally processed intrinsically conductive polymer films with high thermoelectric properties and good air stability

Hongyan Yao, Zeng Fan, Pengcheng Li, Bichen Li, Xin Guan, Donghe Du, Jianyong Ouyang\*

Department of Materials Science and Engineering, National University of Singapore, 117574,  
Singapore

#### Corresponding Author

\*E-mail: [mseoj@nus.edu.sg](mailto:mseoj@nus.edu.sg)

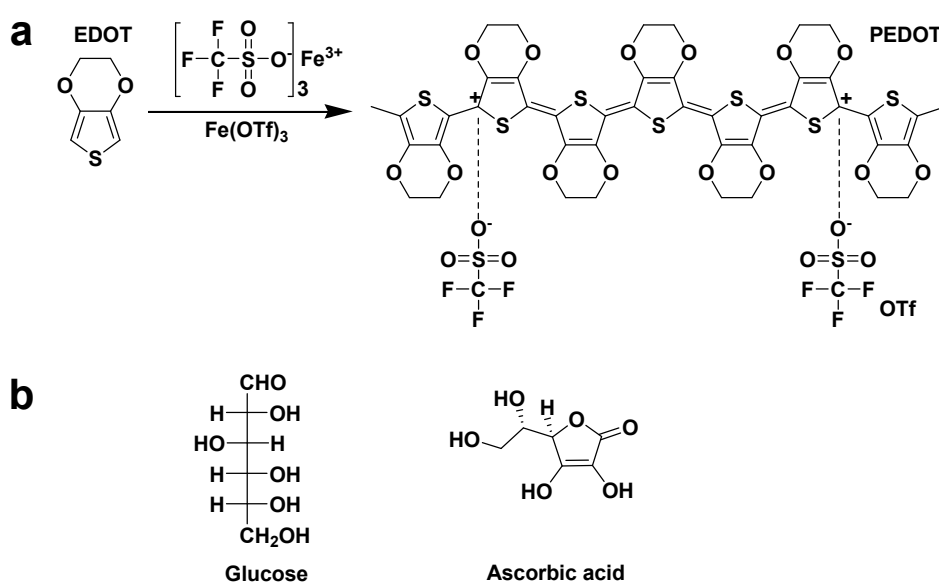

**Scheme S1.** a) Synthesis of PEDOT:OTf through the oxidative polymerization of EDOT by iron (III) trifluoromethanesulfonate ( $\text{Fe}(\text{OTf})_3$ ), b) the chemical structure of glucose, ascorbic acid and EDA.

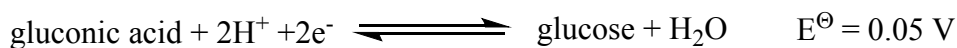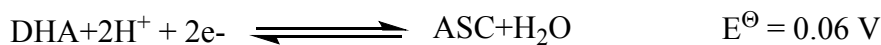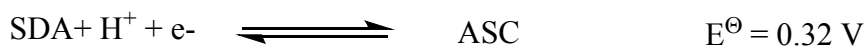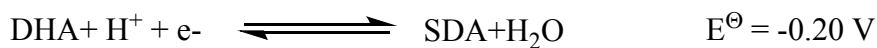

Where ASC is ascorbic acid, DHA is dehydroascorbic acid and SDA is semidehydroascorbic acid radical.

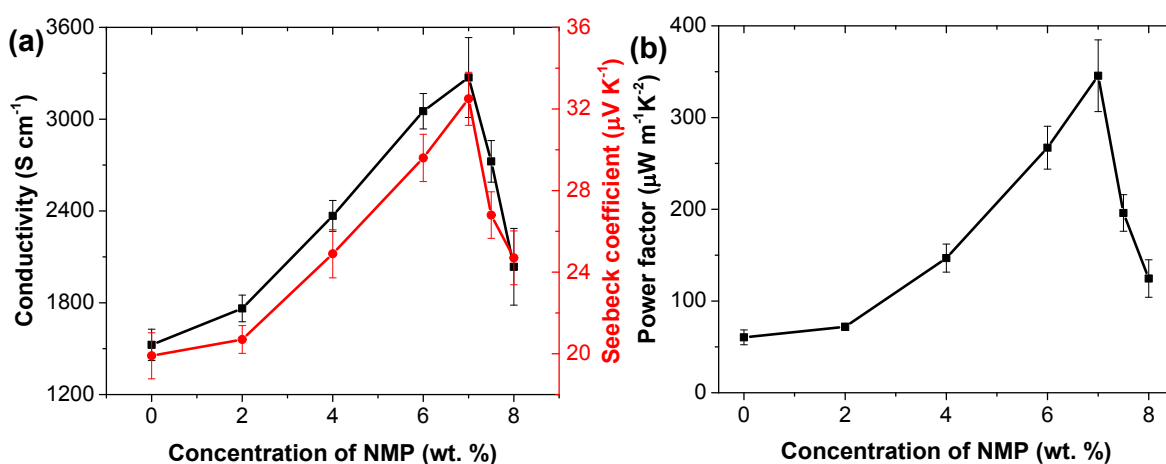

**Fig. S1** Thermoelectric properties of the as-synthesized PEDOT:OTf films. Dependences of (a) the electrical conductivity, (b) Seebeck coefficient and (c) power factor of the as-synthesized PEDOT:OTf films on the concentration of NMP.

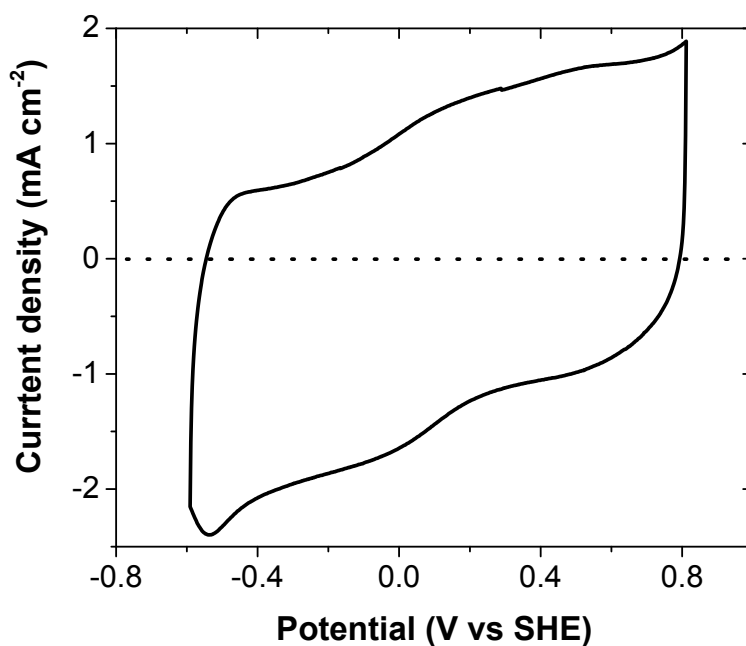

**Fig. S2** CV curve of an as-synthesized PEDOT:OTf film in a 1.0 M KCl solution.

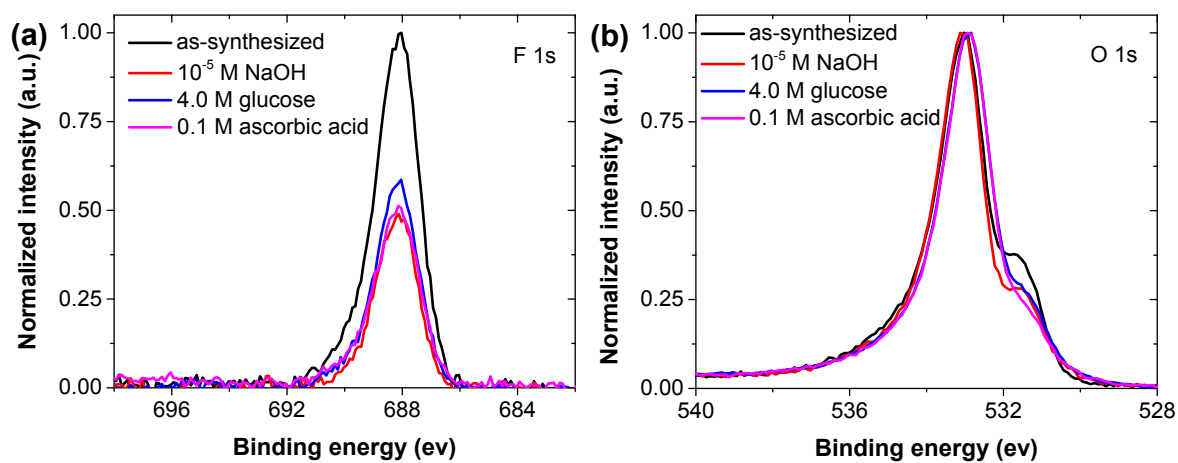

**Fig. S3** (a) F<sub>1s</sub> and (b) O<sub>1s</sub> XPS spectra of as-synthesized, glucose-, ascorbic acid- and NaOH-treated PEDOT:OTf films.

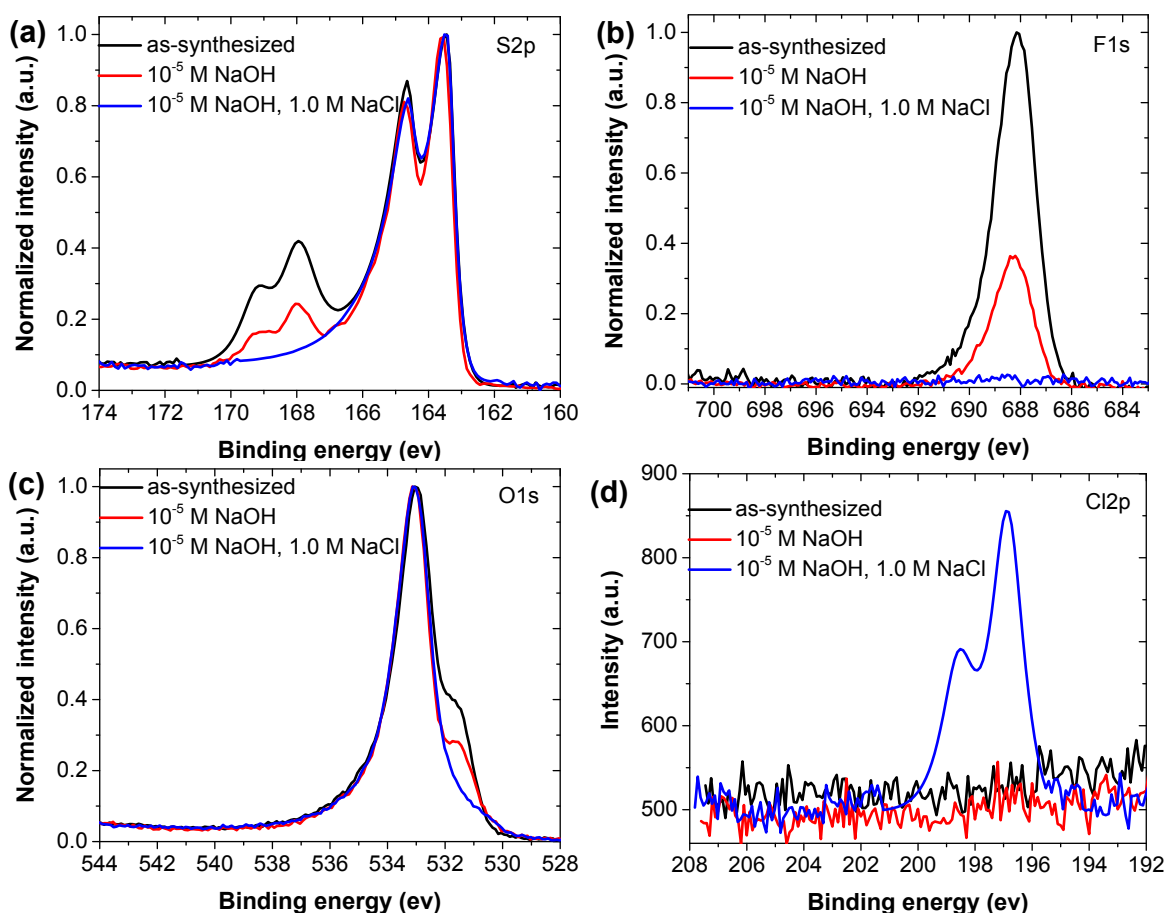

**Fig. S4** (a) S 2p, (b) F 1s, (c) O 1s and (d) Cl 2p XPS spectra of as-synthesized and 10<sup>-5</sup> M NaOH-treated, and 10<sup>-5</sup> M NaOH-treated-then-1.0 M NaCl-treated PEDOT:OTf films.

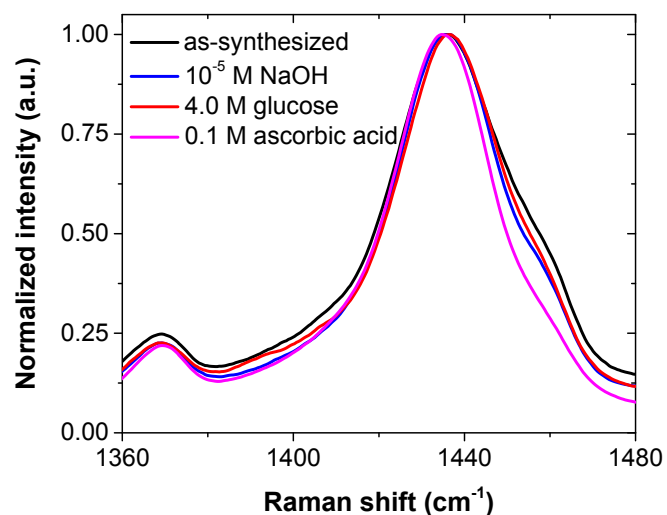

**Fig. S5** Raman spectra of the as-synthesized and NaOH, glucose and ascorbic acid treated PEDOT:OTf films.

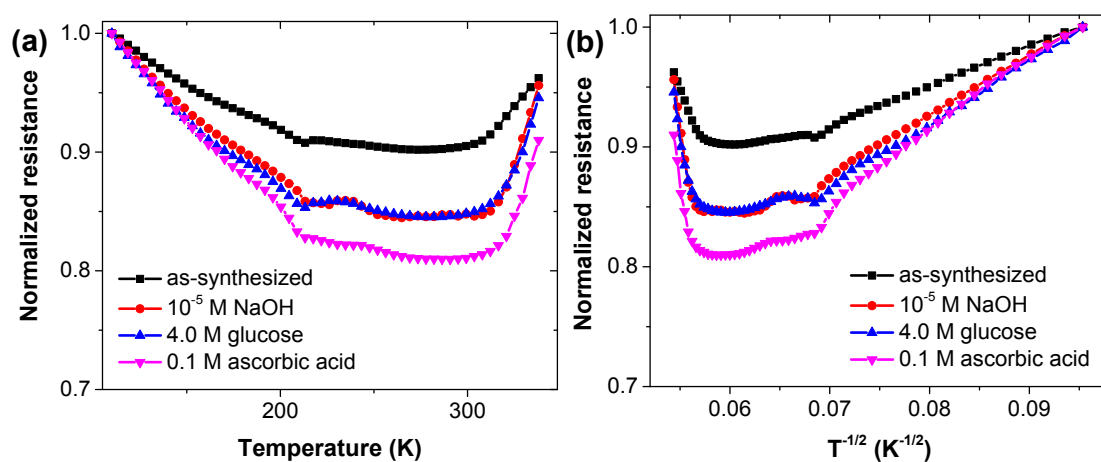

**Fig. S6** (a) Temperature dependences of the resistances of PEDOT:OTf films treated with NaOH, glucose and ascorbic acid. (b) Analysis of resistance-temperature relationships with the 1D VRH model.

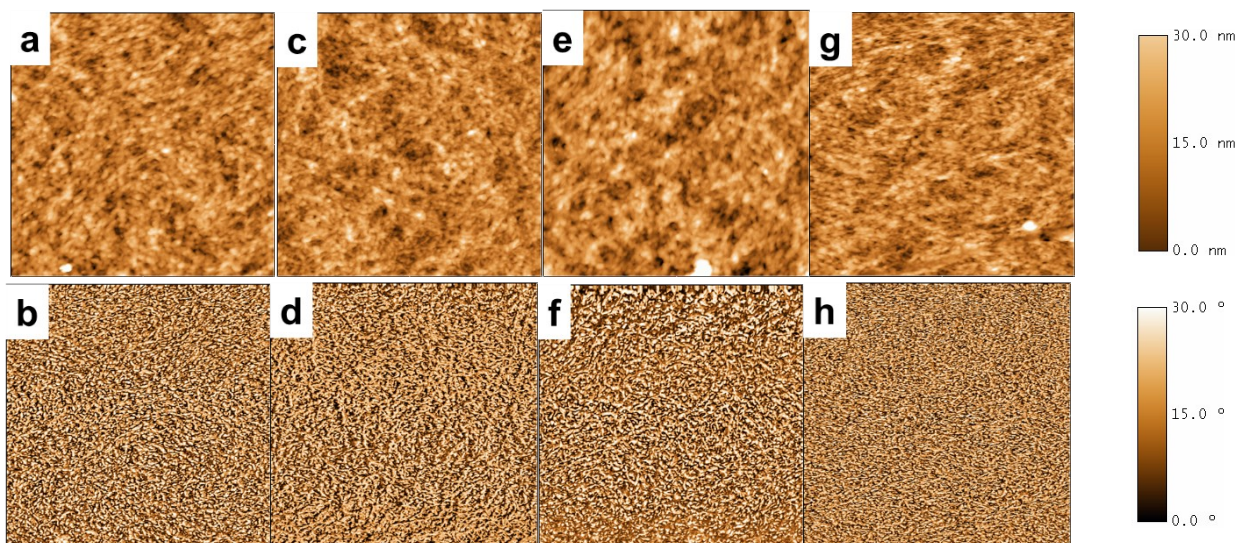

**Fig. S7** AFM images of PEDOT:OTf films treated with glucose solutions of different concentration, (a) and (b) 0.5 M, (c) and (d) 1.0 M, (e) and (f) 2.0 M, and (g) and (h) 4.0 M. The dimension is  $2 \times 2 \mu\text{m}^2$  for each AFM image.

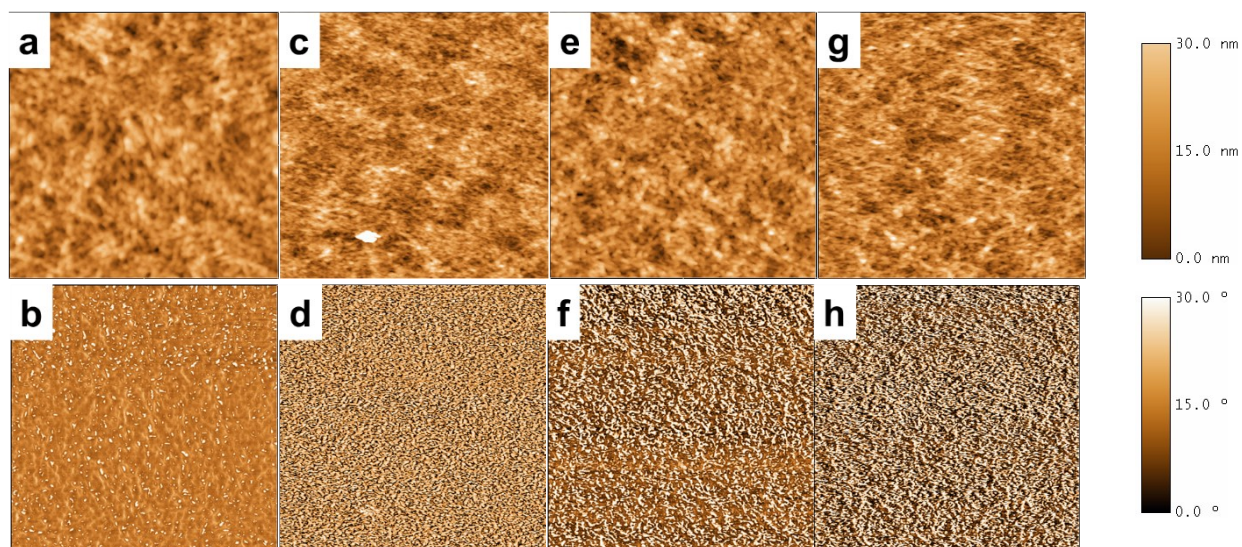

**Fig. S8** AFM images of PEDOT:OTf films treated with ascorbic acid solutions of different concentration, (a) and (b) 0.1 M, (c) and (d) 0.25 M, (e) and (f) 0.5 M, and (g) and (h) 1.0 M. The dimension is  $2 \times 2 \mu\text{m}^2$  for each AFM image.

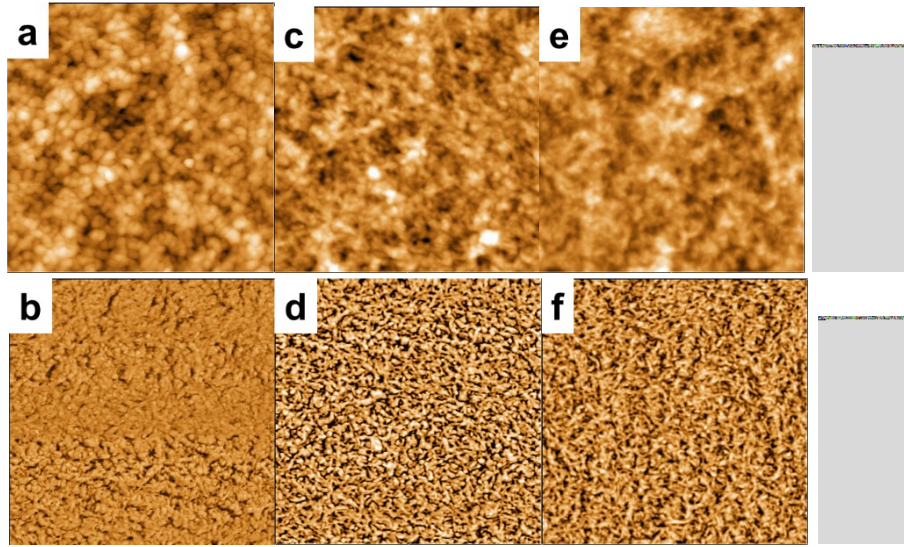

**Fig. S9** AFM images of PEDOT:OTf films treated with NaOH solutions of different concentration, (a) and (b)  $10^{-5}$  M, (c) and (d)  $10^{-3}$  M, and (e) and (f)  $10^{-1}$  M. The dimension is  $2 \times 2 \mu\text{m}^2$  for each AFM image

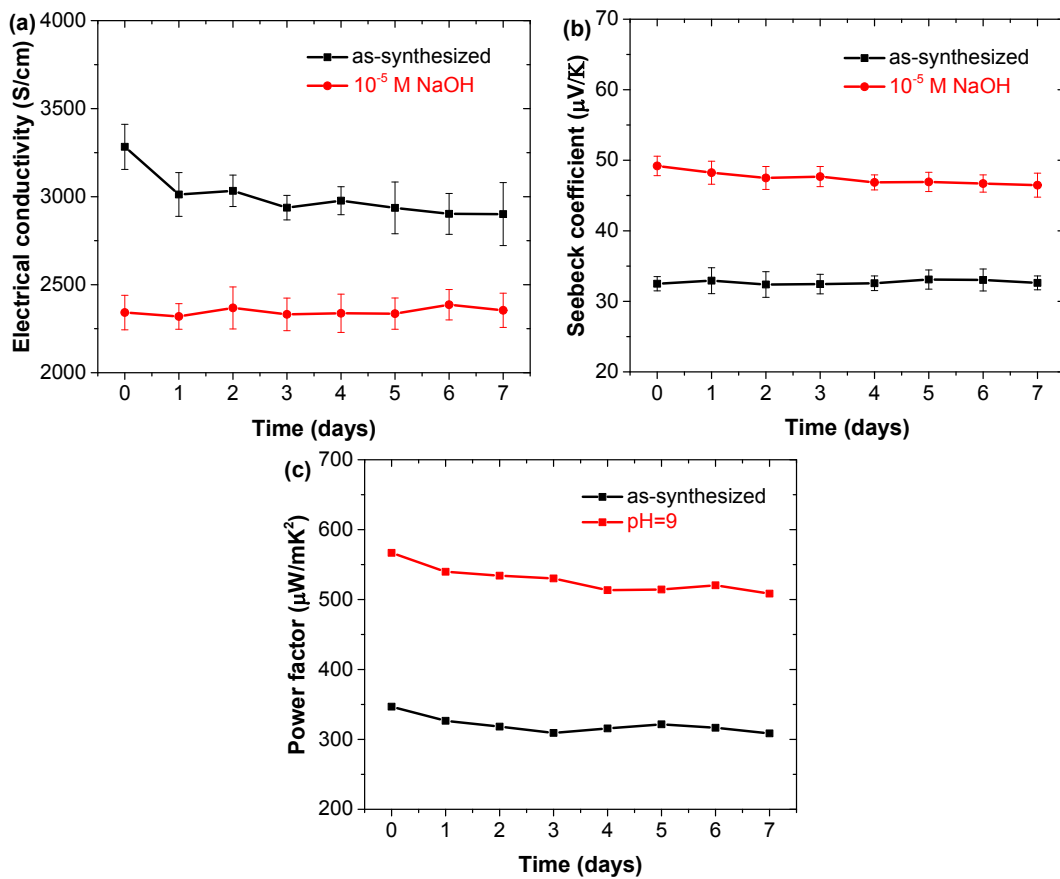

**Fig. S10** Stability of as-synthesized and NaOH-treated PEDOT:OTf films. Variations of (a) the electrical conductivity, (b) Seebeck coefficient and (c) power factor over the time.

**Table S1.** Electrical conductivity, Seebeck coefficient, and power factor of PEDOT:OTf films treated with glucose, ascorbic acid and NaOH solutions.

| Chemical                | Redox potential (V) | Doping level (%) | Seebeck coefficient ( $\mu\text{V K}^{-1}$ ) | Electrical conductivity ( $\text{S cm}^{-1}$ ) | Maximum power factor ( $\mu\text{W m}^{-1} \text{K}^{-2}$ ) |
|-------------------------|---------------------|------------------|----------------------------------------------|------------------------------------------------|-------------------------------------------------------------|
| 1.0 M Glucose           | 0.05 <sup>1</sup>   | 16.1             | 39.7 $\pm$ 0.4                               | 2679 $\pm$ 48                                  | 422 $\pm$ 11                                                |
| 4.0 M Glucose           |                     | 13.0             | 40.3 $\pm$ 0.2                               | 2363 $\pm$ 198                                 | 384 $\pm$ 32                                                |
| 0.10 M Ascorbic acid    | 0.06 <sup>2</sup>   | 12.1             | 40.9 $\pm$ 2.8                               | 2304 $\pm$ 19                                  | 387 $\pm$ 53                                                |
| 0.25 M Ascorbic acid    |                     | 11.8             | 41.3 $\pm$ 1.0                               | 2287 $\pm$ 80                                  | 390 $\pm$ 24                                                |
| 10 <sup>-5</sup> M NaOH | -                   | 12.8             | 49.2 $\pm$ 1.4                               | 2342 $\pm$ 98                                  | 568 $\pm$ 64                                                |

**Table S2.** Summary of the highest power factors for the PEDOT family in literature. The polymers are prepared by different methods.

| Polymer   | Method                                                                        | Seebeck coefficient ( $\mu\text{V K}^{-1}$ ) | Electrical conductivity ( $\text{S cm}^{-1}$ ) | Maximum power factor ( $\mu\text{W m}^{-1} \text{K}^{-2}$ ) | Reference number |
|-----------|-------------------------------------------------------------------------------|----------------------------------------------|------------------------------------------------|-------------------------------------------------------------|------------------|
| PEDOT:PSS | Secondary dopants (5 vol% DMSO, 0.3 vol% PEO)                                 | 38.4 $\pm$ 7.1                               | 1061 $\pm$ 16                                  | 157.35                                                      | 3                |
|           | Chemical dedoping (DMSO, (0.0175 wt%) Hydrazine)                              | 67                                           | 578                                            | 112                                                         | 4                |
|           | Acid and NaOH treatment (1M H <sub>2</sub> SO <sub>4</sub> and 0.5 M NaOH aq) | 39.2                                         | 2170                                           | 334                                                         | 5                |
| PEDOT:Tos | NaOH treatment (NaOH aq)                                                      | ~20                                          | ~650                                           | 26                                                          | 6                |
|           | Chemical dedoping (TDAE)                                                      | ~220                                         | ~67                                            | 324                                                         | 7                |
| PEDOT:OTf | Electrochemical dedoping                                                      | ~117                                         | ~923                                           | 1270                                                        | 8                |
|           | NaOH treatment (NaOH aq)                                                      | 49.2 $\pm$ 1.4                               | 2342 $\pm$ 98                                  | 568 $\pm$ 64                                                | This work        |

## References

1. P. Shapley, 2011 *Standard reduction half-cell potentials. Physical Constants and Tables*. Retrieved May 6, 2018, from <http://butane.chem.uiuc.edu/pshapley/genchem2/Tables.html#n>.
2. H. Sapper, S. O. Kang, H. H. Paul and W. Lohmann, *Z. Naturforsch C*, 1982, **37**, 942-946.
3. C. Yi, A. Wilhite, L. Zhang, R. Hu, S. S. Chuang, J. Zheng and X. Gong, *ACS Appl. Mater. Interfaces*, 2015, **7**, 8984-8989.
4. H. Park, S. H. Lee, F. S. Kim, H. H. Choi, I. W. Cheong and J. H. Kim, *J. Mater. Chem. A*, 2014, **2**, 6532-6539.



5. Z. Fan, P. Li, D. Du and J. Ouyang, *Adv. Energy Mater.*, 2017, **7**, 1602116.
6. Z. U. Khan, O. Bubnova, M. J. Jafari, R. Brooke, X. Liu, R. Gabrielsson, T. Ederth, D. R. Evans, J. W. Andreasen, M. Fahlman and X. Crispin, *J. Mater. Chem. C*, 2015, **3**, 10616-10623.
7. O. Bubnova, Z. U. Khan, A. Malti, S. Braun, M. Fahlman, M. Berggren and X. Crispin, *Nat. Mater.*, 2011, **10**, 429-433.
8. T. Park, C. Park, B. Kim, H. Shin and E. Kim, *Energ. Environ. Sci.*, 2013, **6**, 788-792.
